# Supplementary material for: Evolution of Air Plastron Thickness and Slip Length over Superhydrophobic Surfaces in Taylor Couette Flows
Source: MDPI journal article supplement (doi:10.3390/fluids8040133), 2023-04-17
Supplement: s1 [file s1]

# Supplementary Material: Defect Theory Derivation of the Outer Wall of Taylor-Couette Cell Flow

Ahmed Faraj Alarbi Alsharief <sup>1,2,\*</sup>, Xili Duan <sup>1</sup> and Yuri Muzychka <sup>1</sup>

<sup>1</sup> Department of Mechanical Engineering, Faculty of Engineering and Applied Science, Memorial University of Newfoundland (MUN), St. John's, NL A1B 3X5, Canada

<sup>2</sup> Department of Mechanical Engineering, Faculty of Engineering, Omar Al-Mukhtar University, Albyda P.O. Box 991, Libya

\* Correspondence: afamohamed@mun.ca

Using the defect theory, Panton [1] matches the approximately constant angular momentum in the bulk of the TC flow to that of the wall layers.

$$\langle \gamma \rangle = r \cdot \langle V_\theta \rangle \quad (\text{S})$$

In the outer bulk region, the angular momentum in his theory is expressed as:

$$\langle \gamma \rangle = \langle \gamma_o \rangle + \left\langle \frac{u_\tau}{V_i} \right\rangle \langle \gamma_1 \rangle \quad (\text{S1})$$

where  $V_i = \Omega \cdot r_i$  is the inner rotor velocity (measuring bob)

$\langle \gamma_o \rangle$  is the constant angular velocity;  $\langle \gamma_1 \rangle$  is a first-order correction

$V_\theta$  is the circumferential velocity, and a time average is indicated by  $\langle \rangle$

In the limit of  $\text{Re} \longrightarrow \infty$ , the ratio of the rotor velocity  $\left\langle \frac{u_\tau}{V_i} \right\rangle \rightarrow 0$ .

Therefore, it is the introduction of the defect term  $\langle \gamma_1 \rangle$  that facilitates matching with the wall layer.

On the inner wall, the angular momentum decreases as  $(r_i V_i) - \langle \gamma \rangle$ ,

where the  $(r_i V_i)$  is the angular momentum, which is induced by wall motion.

Upon scaling with friction velocity  $u_\tau$  and the viscous length scale  $\delta_v$ , ascaled angular momentum  $\langle \gamma^+ \rangle$  can be defined as a function of the scaled wall distance  $y^+ = \frac{(r-r_i)}{\delta_v}$  as follows:

$$\gamma^+_{(y^+)} = \frac{r_i V_i - \langle \gamma \rangle}{r_i \cdot u_\tau} \quad (\text{S2})$$

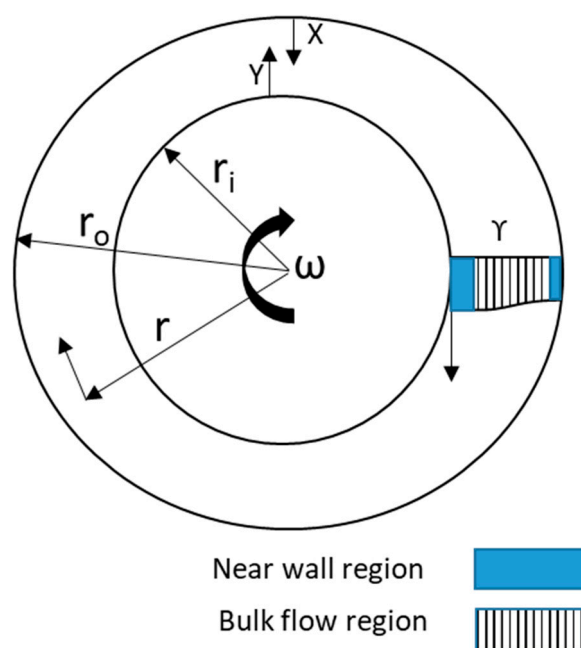

**Figure S1.** Taylor–Couette flow with the inner cylinder rotating and the outer fixed cylinder

As Panton [1] suggested, the most important results come from mathematically matching the angular momentum laws of the core and wall regions. There is an overlap region where both the wall representation  $\gamma^+_{(y^+)}$  and the core representation  $\Gamma_{(Y)}$  are valid. Where  $\Gamma_o = \frac{\langle \gamma_o \rangle}{(r_i \cdot V_i)}$  and  $\Gamma_{1(Y)} = \frac{\langle \gamma_1 \rangle}{(r_i \cdot V_i)}$ .

Matching these values in the overlap region leads to:

$$(\gamma^+) \left( \frac{u_\tau}{V_i} \right) = 1 - \Gamma_o - \left( \frac{u_\tau}{V_i} \right) \cdot \Gamma_{1(Y)} \quad (\text{S3})$$

where  $\Gamma_1$  is a function of the outer variable  $Y = \frac{(r-r_i)}{d}$  while  $\gamma^+$  is a function of

$$y^+ = \frac{(r - r_i)}{\delta_v}$$

Proceeding according to Panton [1], differentiating both sides of Eq. (3) by  $Y$  in the overlap region and using the relation  $\frac{y^+}{Y} = \frac{\Delta r}{\delta_v}$  results in the relation

$$y^+ \frac{dy^+}{dy^+} = -Y \frac{d\Gamma_1}{dY} \equiv \frac{1}{\alpha}$$

where  $\alpha$  is a constant independent of  $Y$  and  $y^+$ .

Panton [1] suggested that for a boundary layer in the Taylor Couette cell,  $\alpha$  should reduce to the universal von Karman constant  $K$  in the zero curvature limit. Solving this expression results in the identical set of the equation of  $Y^+$  and  $\Gamma_1$  that Panton (1992) obtains as:

$$\Gamma_1 = \frac{-1}{\alpha} \cdot \ln Y + C_1 \longrightarrow Y \quad (S4)$$

$$y^+ = \frac{1}{\alpha} \cdot \ln(y^+) \quad y^+ \rightarrow \infty \quad (S5)$$

However, the substitution of Equations (S4) and (S5) into our modified form of Equation (S3) gives

$$(1 - \Gamma_1) = \frac{1}{\alpha} \cdot \ln Re_\tau + C_1 + C_2 \quad (S6)$$

$$\text{where} \quad Re_\tau = \frac{u_\tau \cdot d}{\nu}$$

Repeating the same calculation at the coated stationary outer wall surface in the  $X$  direction with:

$$y^+ = \frac{(r_o \cdot V_{slip} - \langle \gamma \rangle)}{r_i \cdot u_\tau} \quad (S8)$$

First considering the existence of an overlap region where both representations are valid, Equation (S) can be substituted into Equation (S7). Then, using the modified theory of Srinivasan's work [2] by introducing a finite averaged slip velocity  $\langle V_{slip} \rangle$  that is related to the local viscous stress at the outer CDC's wall by the Navier slip hypothesis as

$$\langle V_{slip} \rangle = \left( \frac{dV_\theta}{dX} \right)_{X=0}$$

where  $b$  is the effective slip length due to the superhydrophobic coating and  $\left( \frac{dV_\theta}{dX} \right)_{X=0}$  is the time-averaged velocity gradient at the wall.

The distance away from the outer (coated) wall expressed in wall units is

$$X^+ = \frac{(r_o - r)}{\delta_v} \quad (S8)$$

If the velocity in the viscous sublayer close to the outer wall is shifted by a constant value, according to Min & Kim [3], so that  $\langle V_\theta^+ \rangle = X^+ + b^+$  and  $\frac{d\langle V_\theta^+ \rangle}{dX^+} = 1$ , the Navier slip hypothesis upon scaling reduces to :

$$V_{slip}^+ = b^+ \quad (S9)$$

$$\text{where } V_{slip}^+ = \frac{V_{slip}}{u_\tau} \quad \text{and} \quad b^+ = \frac{b_{eff}}{\delta_v}$$

There is an overlap region where both the wall representation  $(\gamma)_{(X)}^+$  and the core representation  $\Gamma(X)$  are valid.

Matching the values in this region yields:

$$(\gamma^+ + b^+) = 1 - \Gamma_o - \frac{u_\tau}{V_i} \quad (S10)$$

Repeating the argument given in the Y direction for the coated wall layer on the outer cylinder

gives two more overlaps laws  $(X = r_o - r), X = \frac{X}{d}$

$$X^+ = x \cdot \frac{u_\tau}{\nu} = XRe_\tau \text{ and } \gamma^+ = \frac{\langle \gamma \rangle}{(r_o u_\tau)}$$

This leads to the following matched expression

$$\Gamma_1 = \frac{1}{\beta} \ln(X) + C_3 \quad X \rightarrow 0 \quad (\text{S11})$$

$$\gamma^+ = \frac{1}{\beta} \ln(X^+) + C_4 \quad X \rightarrow \infty \quad (\text{S12})$$

Substitute (12) and (13) in eqn. (11) leads to another friction velocity relation

$$\Gamma_o \frac{V_i}{u_\tau} = \frac{1}{\beta} \ln Re_\tau + C_3 + C_4 + b^+ \quad (\text{S13})$$

Finally, the Equations (S7) and (S14) are added together to eliminate  $\Gamma_o$  and using

$$\frac{V_i}{u_\tau} = \left( \frac{C_f}{2} \right)^{-\frac{1}{2}}$$

We obtain the modified skin friction law in the presence of slip that is used as Equation (S14)

$$\sqrt{\frac{2}{C_f}} = M \cdot \ln(Re_\tau) + N + b^+ \quad (\text{S14})$$

where,  $M = \left( \frac{1}{\alpha} + \frac{1}{\beta} \right)$  and  $N = C_1 + C_2 + C_3 + C_4$  are constants that depend only on the curvature of the TC cell. These constants can be determined from friction measurements with non-coated surfaces and plotted in Prandtl-von Karman coordinates.

## References

1. Panton, R.L. Panton 1992-Scaling laws for the angular momentum of a completely turbulent couette flow. *C. R. Acad. Sci. Ser. II* **1992**, *315*, 1467–1473.
2. Srinivasan, S.; Kleingartner, J.A.; Gilbert, J.B.; Cohen, R.E.; Milne, A.J.B.; McKinley, G.H. Sustainable drag reduction in turbulent Tay-lor-Couette flows by depositing sprayable superhydrophobic surfaces. *Phys. Rev. Lett.* **2015**, *114*, 014501.
3. Choi, C.H.; Ulmanella, U.; Kim, J.; Ho, C.M.; Kim, C.J. Effective slip and friction reduction in nanograted superhydrophobic microchannels. *Phys. Fluids* **2006**, *18*, 087105.

**Disclaimer/Publisher's Note:** The statements, opinions and data contained in all publications are solely those of the individual author(s) and contributor(s) and not of MDPI and/or the editor(s). MDPI and/or the editor(s) disclaim responsibility for any injury to people or property resulting from any ideas, methods, instructions or products referred to in the content.
